# Supplementary material
Source: MDPI journal article supplement (https://www.mdpi.com/2073-4441/14/3/415)
Supplement: s1 [file s1]

## Supplementary material

**Table S1.** The standard methods and main instruments used for water quality testing.

| Water quality parameter | Testing methods                                                                           | Main instruments                            |
|-------------------------|-------------------------------------------------------------------------------------------|---------------------------------------------|
| TSS                     | GB 11901-1989<br>Gravimetric method                                                       | Auy-220<br>Air blast drying box             |
| COD <sub>Cr</sub>       | HJ 828-2017<br>Potassium dichromate Method                                                | DR6000<br>UV / visible<br>spectrophotometer |
| TN                      | HJ 636-2012<br>Alkaline potassium persulfate<br>digestion UV<br>spectrophotometric method | DR6000<br>UV / visible<br>spectrophotometer |
| NH <sub>3</sub> -N      | HJ 535-2009<br>Nessler 's reagent<br>spectrophotometry method                             | DR6000<br>UV / visible<br>spectrophotometer |
| NO <sub>3</sub> -N      | HJ 84-2016<br>Ion chromatography method                                                   | ICS-1100<br>Ion chromatograph               |
| TP                      | GB 11893-1989<br>Ammonium molybdate<br>spectrophotometric method                          | DR6000<br>UV / visible<br>spectrophotometer |

**Table S2.** The standard methods and main instruments used for media chemical property testing.

| Media chemical<br>property parameter | Testing methods                                               | Main instruments                           |
|--------------------------------------|---------------------------------------------------------------|--------------------------------------------|
| pH                                   | NYT1377-2007<br>Potentiometry method                          | PHS-3C<br>Acidometer                       |
| Soil total nitrogen                  | LY/T 1228-2015<br>Kjeldahl determination method               | K9860<br>Automatic azotometer              |
| Organic matter                       | NY/T 1121.6-2006<br>Potassium dichromate volumetric<br>method | /                                          |
| Soil total<br>phosphorus             | LY/T 1232-2015<br>Alkali fusion                               | UV-1601<br>UV / visible spectrophotometer  |
| Total salt content                   | LYT 1251-1999<br>Gravimetric method                           | DH-202<br>constant temperature drying oven |
| Cation exchange<br>capacity          | LY/T1243-1999<br>Ammonium acetate exchange<br>method          | /                                          |
